# Supplementary material for: hOA-DN30: a highly effective humanized single-arm MET antibody inducing remission of ‘MET-addicted’ cancers
Source: Springer Nature journal article supplement (doi:10.1186/s13046-022-02320-6), 2022-03-29
Supplement: MOESM3 [file 20264344]

Supplementary Table 1: MET gene copy number

| Cell line or PDX | Fold Amplification <sup>#</sup> |
|------------------|---------------------------------|
| A549             | 1 ± 0.06                        |
| EBC-1            | 11.9 *                          |
| GTL-16           | 10.42 ± 0.69                    |
| SNU-5            | 9.2 *                           |
| Kato-II          | 18 <sup>§</sup>                 |
| Hs746T           | 17.9*                           |
| Caki-I           | 2.14 ± 0.04                     |
| NCI-H226         | 1.13 ± 0.07                     |
| NCI-H441         | 2.37 ± 0.15                     |
| GTR-661          | 3.11 ± 0.61                     |
| GTR-561          | 74.66 ± 5.89                    |
| SG16             | 12.63 ± 0.28                    |

<sup>#</sup> Fold change in MET gene copy number with respect to the diploid cell line A549, determined by real-time qPCR.

\* Data from Pennacchietti et al., Can Res 2014; PMID: 25217525

<sup>§</sup> Data from Smolen et al., PNAS 2006; PMID: 16461907

Supplementary Table 2: hOA-DN30 pharmacokinetics parameters in the mouse. Compartmental analysis results

| Parameter                               | mice w/o tumor | Mice with tumor |
|-----------------------------------------|----------------|-----------------|
| T1/2 $\alpha$ (h)                       | 3.37           | 2.71            |
| T1/2 $\beta$ (h)                        | 120.60         | 72.05           |
| Cmax ( $\mu\text{g/ml}$ )               | 1142.09        | 1055,18         |
| AUC ( $\text{h} \cdot \mu\text{g/ml}$ ) | 70728.72       | 32934.53        |
| Vss ( $\text{ml/kg}$ )                  | 70.07          | 86.40           |
| CL ( $\text{ml/h/kg}$ )                 | 0.424          | 0.911           |
| CLD ( $\text{ml/h/kg}$ )                | 3.205          | 4.460           |
| V1 ( $\text{ml/kg}$ )                   | 26.27          | 28.43           |
| V2 ( $\text{ml/kg}$ )                   | 43.80          | 57.97           |

T1/2, $\alpha$ : Half-life of the first phase; T1/2, $\beta$ : Half-life of the second phase; Cmax: maximum concentration; AUC: Area Under serum concentration; CL: Serum Clearance; CLD: Distribution Clearance; V1: Volume of the central compartment; V2: Volume of the peripheral compartment.

Supplementary Table 3: hOA-DN30 pharmacokinetics parameters in the mouse.  
Non-compartmental analysis results

| Parameter                                                      | Mice w/o tumor | Mice with tumor |
|----------------------------------------------------------------|----------------|-----------------|
| $C_{\max}$ ( $\mu\text{g/ml}$ )                                | 1188.55        | 1200.27         |
| $T_{\max}$ (h)                                                 | 0.083          | 0.083           |
| $C_{\text{last}}$ ( $\mu\text{g/ml}$ )                         | 145.79         | 52.47           |
| $T_{\text{last}}$ (h)                                          | 168            | 168             |
| $\text{AUC}_{\text{last}}$ ( $\text{h} \cdot \mu\text{g/ml}$ ) | 46313.90       | 30557.25        |
| $\text{AUC}_{\infty}$ ( $\text{h} \cdot \mu\text{g/ml}$ )      | 70055.70       | 35109.08        |
| AUC Extrapol (%)                                               | 33.89          | 12.96           |
| CL ( $\text{ml/h/kg}$ )                                        | 0.428          | 0.854           |
| V <sub>ss</sub> ( $\text{ml/kg}$ )                             | 65.93          | 71.27           |
| V <sub>z</sub> ( $\text{ml/kg}$ )                              | 69.74          | 74.12           |
| $\text{MRT}_{\text{last}}$ (h)                                 | 63.29          | 57.89           |
| $\text{MRT}_{\infty}$ (h)                                      | 153.96         | 83.41           |
| T 1/2.z (h)                                                    | 112.88         | 60.13           |

$C_{\max}$ : maximum concentration;  $T_{\max}$ : time to peak concentration;  $C_{\text{last}}$ : last detectable concentration;  $T_{\text{last}}$ : Time to last detectable concentration;  $\text{AUC}_{\text{last}}$ : Area under serum concentration vs. time curve up to the last detectable concentration;  $\text{AUC}_{\infty}$ : Area under serum concentration vs. time curve up to infinite time; AUC Extrapol: percentage of the area under the curve extrapolated to infinity; CL: Serum Clearance; V<sub>ss</sub>: Volume of distribution at steady-state; V<sub>z</sub>: Volume of distribution on the terminal phase;  $\text{MRT}_{\text{last}}$ : Mean Residence Time at the time of the last detectable concentration;  $\text{MRT}_{\infty}$ : Mean Residence Time up to infinite time; T1/2,z: Terminal half-life.

Supplementary Table 4: hOA-DN30 pharmacokinetics parameters in the monkey.  
Non-compartmental analysis results

| Parameter                                                                       | Mean (n=3) | S.D.  | %CV  |
|---------------------------------------------------------------------------------|------------|-------|------|
| $C_0$ ( $\mu\text{g}/\text{mL}$ )                                               | 393        | 20.8  | 5.3  |
| $\text{AUC}_{\text{last}}$ ( $\mu\text{g}\cdot\text{h}/\text{mL}$ )             | 31200      | 1960  | 6.3  |
| $\text{AUC}_{\infty}$ ( $\mu\text{g}\cdot\text{h}/\text{mL}$ ) <sup>§</sup>     | 34400      | 3400  | 9.9  |
| % AUC Extrapol                                                                  | 9.01       | 4.86  | 53.9 |
| CL ( $\text{mL}/\text{kg}/\text{h}$ )                                           | 0.322      | 0.032 | 9.9  |
| V <sub>ss</sub> ( $\text{mL}/\text{kg}$ )                                       | 79.9       | 12.5  | 15.7 |
| V <sub>z</sub> ( $\text{mL}/\text{kg}$ )                                        | 88.4       | 12.7  | 14.4 |
| MRT (h)                                                                         | 251        | 59.9  | 23.8 |
| $C_0/\text{Dose}$ ( $\mu\text{g}/\text{mL}$ )                                   | 35.7       | 1.85  | 5.2  |
| $\text{AUC}_{\text{last}}/\text{Dose}$ ( $\mu\text{g}\cdot\text{h}/\text{mL}$ ) | 2840       | 179   | 6.3  |
| $\text{AUC}_{\infty}/\text{Dose}$ ( $\mu\text{g}\cdot\text{h}/\text{mL}$ )      | 3130       | 310   | 9.9  |
| T <sub>1/2,z</sub> (h)                                                          | 193        | 44.2  | 22.9 |

$C_0$ : back extrapolated to y-axis serum concentration after IV dosing, i.e. maximum concentration;  $\text{AUC}_{\text{last}}$ : Area under serum concentration vs. time curve up to the last detectable concentration;  $\text{AUC}_{\infty}$ : Area under serum concentration vs. time curve up to infinite time; AUC Extrapol: percentage of the area under the curve extrapolated to infinity; CL: Serum Clearance; V<sub>ss</sub>: Volume of distribution at steady-state; V<sub>z</sub>: Volume of distribution on the terminal phase; MRT: Mean Residence Time;  $C_0/\text{Dose}$ :  $C_0$  normalized to 1 mg/kg;  $\text{AUC}_{\text{last}}/\text{Dose}$ : Area under serum concentration vs. time curve up to the last detectable concentration normalized to 1 mg/kg;  $\text{AUC}_{\infty}/\text{Dose}$ : Area under serum concentration vs. time curve up to infinite time normalized to 1 mg/kg; T<sub>1/2,z</sub> Terminal half-life.

<sup>§</sup>Interval: 0-672 hrs.
